# Supplementary material for: Nance-Horan-syndrome-like 1b controls mesodermal cell migration by regulating protrusion and actin dynamics during zebrafish gastrulation
Source: Springer Nature journal article supplement (doi:10.1038/s42003-025-07689-6), 2025-02-28
Supplement: MOESM1 [file 42003_2025_7689_MOESM1_ESM.pdf]

## Supplementary Materials and Figures

### **Nance-Horan-Syndrome-like 1b controls mesodermal cell migration by regulating protrusion and actin dynamics during zebrafish gastrulation.**

Sophie Escot, Yara Hassanein, Amélie Elouin, Jorge Torres-Paz, Lucille Mellottee,  
Amandine Ignace, Nicolas B. David

**Figure S1: Epiboly and mesoderm front progression in *nhs1b* knockdown.**

**Figure S2: *nhs1b* expression levels need to be fine-tuned for proper mesodermal migration.**

**Figure S3: Nhs1b knockdown using CRISPR/Cas13d.**

**Movie 1: Lateral mesoderm migration in MO Control and MO Nhs1b.** Time-lapse imaging of *Tg(tbx16:EGFP)* embryos injected with MO Control or MO Nhs1b, *LacZ* (control) or *nhs1b* mRNAs. *nhs1b* knockdown and overexpression slows lateral mesodermal migration Time interval 2 min; scale bar 50  $\mu\text{m}$ .

**Movie 2: Tracking of mesodermal cells.** Tracking of mesodermal cell nuclei, labelled with H2B-mCherry, in *Tg(tbx16:EGFP)* embryos injected with Control or Nhs1b Morpholinos. White spots show the nuclei and tracks are represented in yellow.

**Movie 3: Time lapse imaging of Nhs1b-mNeongreen localisation at the tip of actin-rich protrusions.** Live imaging of Nhs1b-mNeongreen and Lifeact-mCherry expressing mesodermal cells, plated on a coverslip. Time interval 1,3 sec; scale bar 5  $\mu\text{m}$ .

**Movie 4: High temporal resolution imaging of actin flows in MO Control and MO Nhs1b mesodermal cells.** Time-lapse showing growing protrusions in MO Control and MO Nhs1b injected mesodermal cells expressing Lifeact-mNeongreen. Time interval 1,3 sec; scale bar 5  $\mu\text{m}$ .

A.

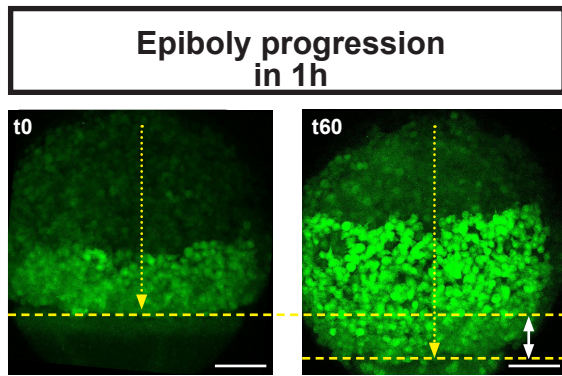

B.

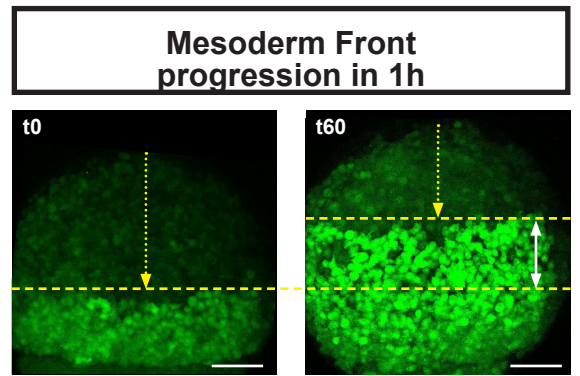

C.

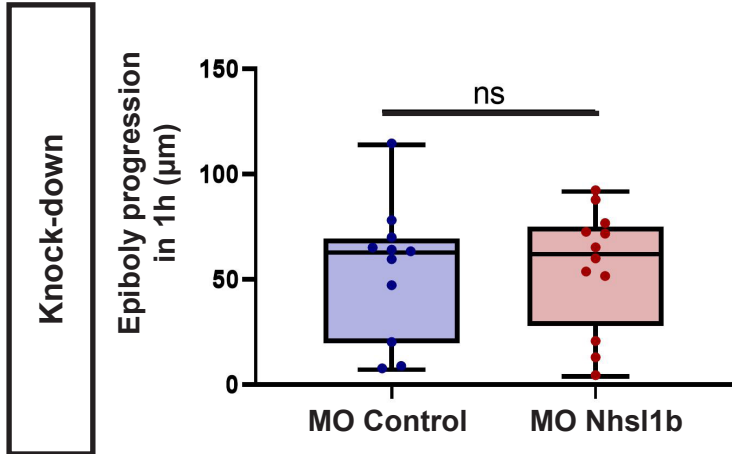

D.

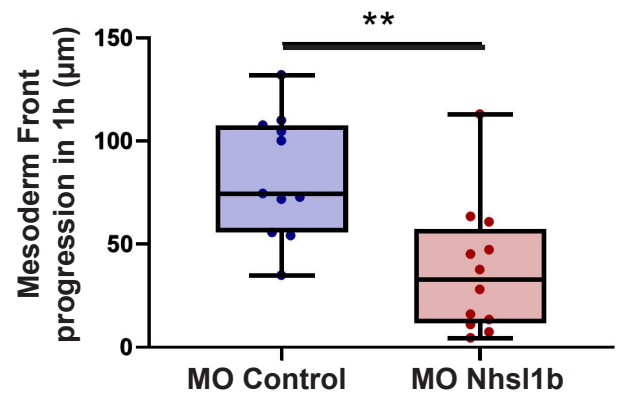

E.

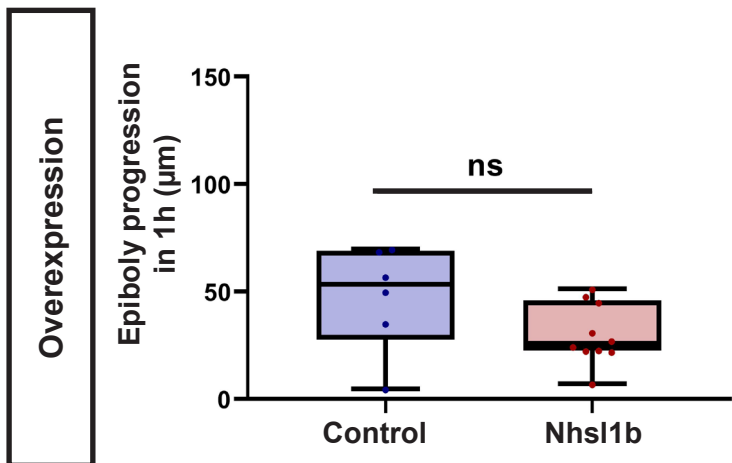

F.

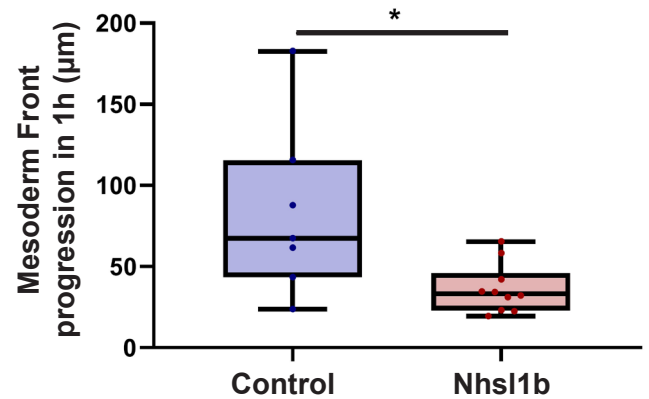

**Figure S1: Epiboly and mesoderm front progression in *nhs1b* knockdown.**

(A) Epiboly progression between early gastrulation (60% epiboly stage) and one hour later. The distance between the animal pole and the embryonic margin was measured at the two time points (yellow dotted arrow), and epiboly progression was calculated as the difference between these measurements (white double arrow). (B) Progression of the mesoderm front between early gastrulation (60% epiboly stage) and one hour later. The distance between the animal pole and the mesoderm front was measured at the two time points (yellow dotted arrow), and progression of the mesoderm front was calculated as the difference between these measurements (white double arrow). (C) Quantification of the epiboly progression. Mann-Whitney test. p-value: MO Control vs MO Nhs1b: 0.6947 ns. (D) Quantification of the mesoderm front progression. Mann-Whitney test. p-value: MO Control vs MO Nhs1b: 0.0028 \*\*. (C-D) MO Control (n=11) or MO Nhs1b injected embryos (n=12). (E) Quantifications of the epiboly progression. Mann-Whitney test. p-value: Control vs Nhs1b: 0.0934 ns. (F) Quantification of mesoderm front progression. Mann-Whitney test. p-value: Control vs Nhs1b: 0.0312 \*. (E-F) lacZ (control) (n=6) or *nhs1b* (n=10) injected embryos. Scale bars 100 μm.

A.

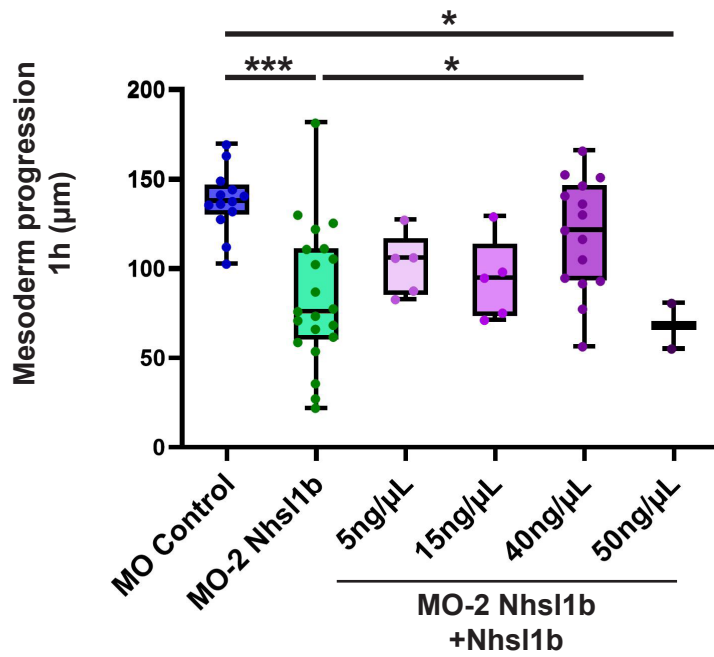

B.

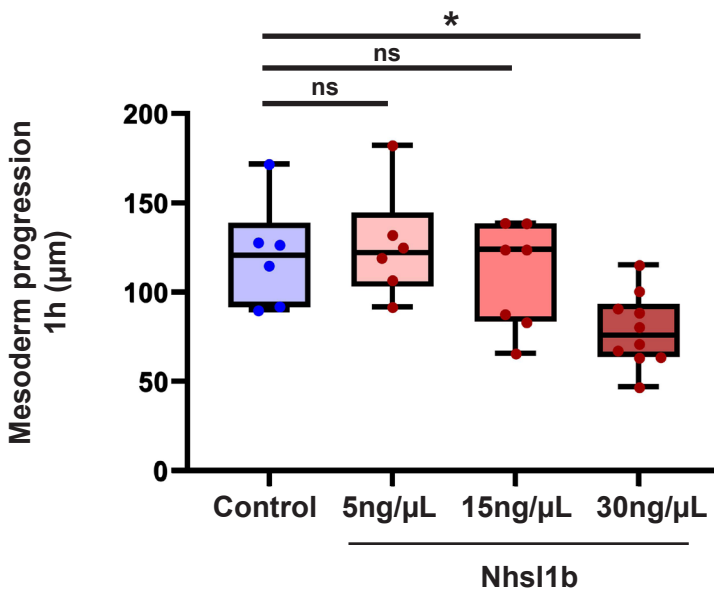

**Figure S2: nhs11b expression levels need to be fine-tuned for proper mesodermal migration.**

(A) Rescue of nhs11b knockdown (MO-2) phenotype on mesoderm progression by co-injecting different concentrations of nhs11b mRNA. Only co-injection of  $40\text{ng}\cdot\mu\text{L}^{-1}$  of nhs11b mRNAs restored mesoderm progression. Kruskal-Wallis test followed by Dunn's multiple comparison test, adjusted p-values: MO Control vs MO-2 Nhs11b:  $<0,001$  \*\*\*; MO Control vs MO-2 Nhs11b +  $50\text{ng}\cdot\mu\text{L}^{-1}$  Nhs11b:  $0,0364$  \*; MO-2 Nhs11b vs MO-2 nhs11b +  $40\text{ng}\cdot\mu\text{L}^{-1}$  Nhs11b:  $0,0208$  \*. (B) Dose-response analysis of nhs11b mRNA overexpression effects on mesoderm progression. Quantification of the lateral mesoderm progression in control embryos and embryos injected with different concentrations of nhs11b mRNA. Low doses (5 and  $15\text{ng}\cdot\mu\text{L}^{-1}$ ) had no significant effect of mesoderm progression,  $30\text{ng}\cdot\mu\text{L}^{-1}$  being the lowest dose inducing an effect. This is slightly lower than the  $40\text{ng}\cdot\mu\text{L}^{-1}$  used in the rescue experiments, as it here comes in addition to the endogenous expression of nhs11b. Kruskal-Wallis test followed by Dunn's multiple comparison test, adjusted p-values: Control vs Nhs11b  $5\text{ng}\cdot\mu\text{L}^{-1}$   $>0.9999$ ; Control vs Nhs11b  $15\text{ng}\cdot\mu\text{L}^{-1}$   $>0.9999$ ; Control vs Nhs11b  $30\text{ng}\cdot\mu\text{L}^{-1}$   $0.0269$ .

A.

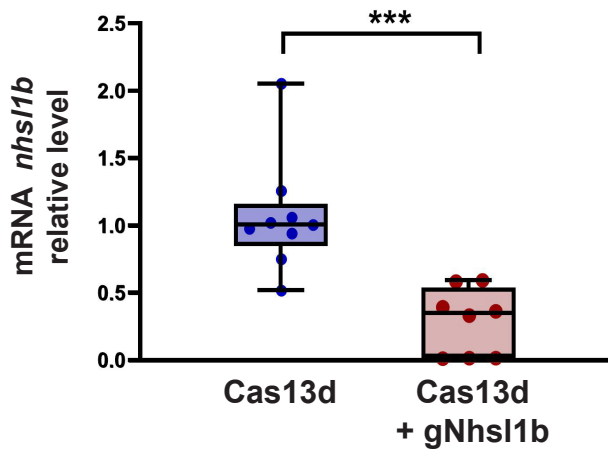

B.

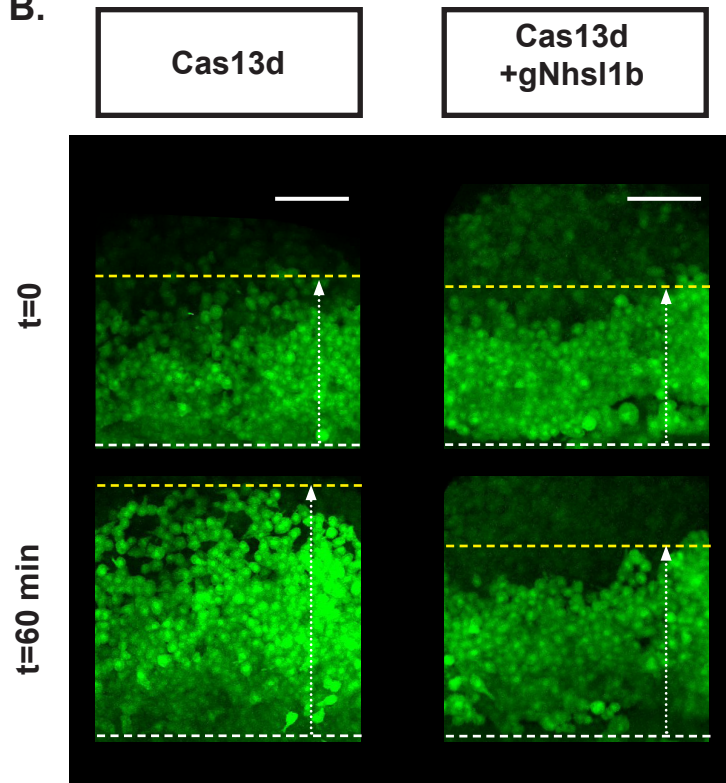

C.

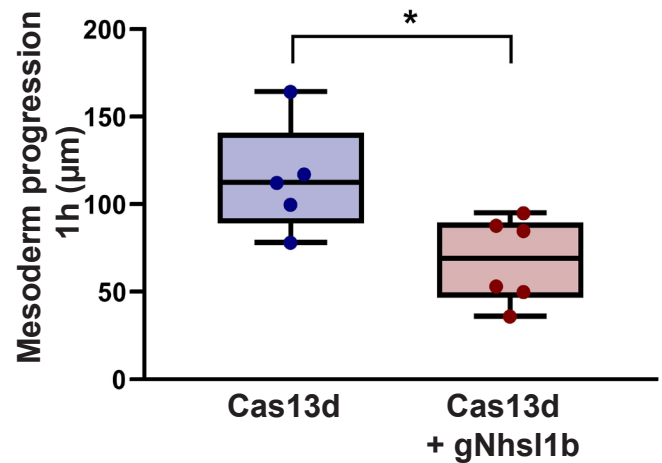

### Figure S3: Nhsl1b knockdown using CRISPR/Cas13d.

(A) RT-qPCR analysis showing levels of *nhsl1b* mRNAs in embryos during gastrulation (9 hours post fertilisation), injected with *cas13d* mRNA alone or *cas13d* mRNA and a mix of 3 gRNAs targeting *nhsl1b*. Results are shown as the averages  $\pm$  standard error of the mean from three independent experiments. *Cdk2ap* mRNA was used as normalization control. Mann-Whitney test. p-value: Cas13d vs Cas13d + gNhsl1b: 0,0003\*\*\*. (B, left) Representative lateral views of Tg(*tbx16*:EGFP) embryos, at early gastrulation (60% epiboly; t=0) and 1 hour later in embryos injected with *cas13d* mRNA alone or *cas13d* mRNA and *nhsl1b* gRNAs. Yellow dashed lines indicate the positions of the embryonic margin and of the front of the migrating mesoderm. Mesoderm progression was measured as the distance between these two lines. Scale bar 100  $\mu$ m. (B, right) Quantification of the lateral mesoderm progression in *cas13d* injected embryos (n= 5), and *cas13d* + *nhsl1b* gRNAs injected embryos (n=6). Mann-Whitney test. p-value: Cas13d vs Cas13d + gNhsl1b: 0,0303\*.
